# Supplementary material
Source: PubMed Central journal article supplement (PMC3081018)
Supplement: 1103175108_pnas.201103175SI.pdf [file 1103175108_pnas.201103175SI.pdf]

# Supporting Information

Deng et al. 10.1073/pnas.1103175108

## SI Materials and Methods

**Analysis of the CARG-Box Motif.** The fuzznuc program (1) was used to search for motifs against the four parts of the FLC binding data. Then, 800 randomly selected promoter and genomic sequences were used as the negative control. The TOMTOM program (2) was used to compare the CARG-box motif of the FLC protein with other proteins with default parameters.

**Gene Expression Analysis and Quantitative RT-PCR.** RNA was extracted from ~100 mg of seedlings by using the RNeasy Plant

Mini Kit according to the manufacturer's instructions (Qiagen). For quantitative RT-PCR, DNase-treated RNA was reverse transcribed with an oligo(dT) primer and SuperScript III reverse transcriptase (Invitrogen), and at least triplicate reactions were amplified by using either a Rotor-Gene 2000 Real-Time Cycler (Corbett Research) or a 7900HT Fast Real-Time PCR System (Applied Biosystems) with SYBR green. The primers used are listed in Table S4.

1. Rice P, Longden I, Bleasby A (2000) EMBOSS: The European Molecular Biology Open Software Suite. *Trends Genet* 16:276–277.

2. Gupta S, Stamatoyannopoulos JA, Bailey TL, Noble WS (2007) Quantifying similarity between motifs. *Genome Biol* 8:R24.

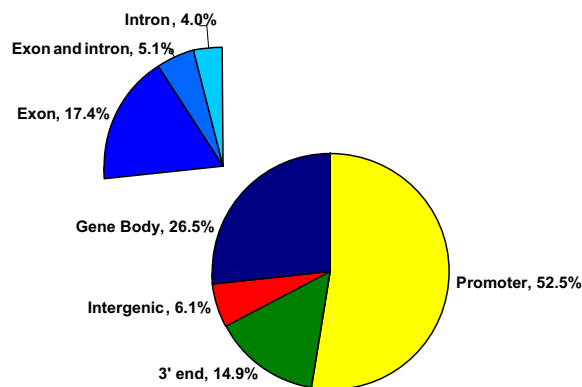

Fig. S1. The genomic locations of FLC binding sites were determined relative to the nearest genes and characterized into four classes: promoter, 3' end, gene body, and intergenic. The gene body class was divided into exon, intron, and exon and intron.

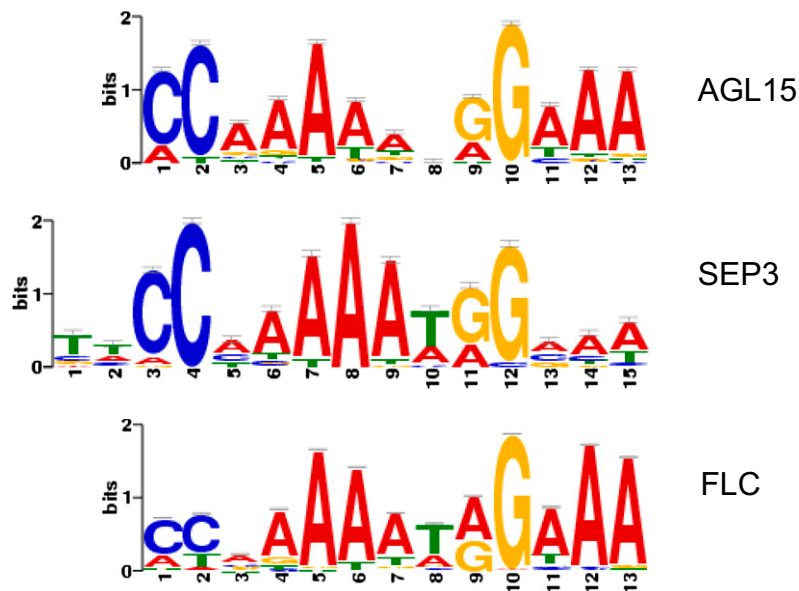

Fig. S2. Comparison of the FLC CARG-box motif with other DNA motifs. A comparison of the FLC CARG-box motif against the DNA motif database was performed by using the TOMTOM program. The DNA motifs with high similarity to the FLC CARG-box motif were included here.

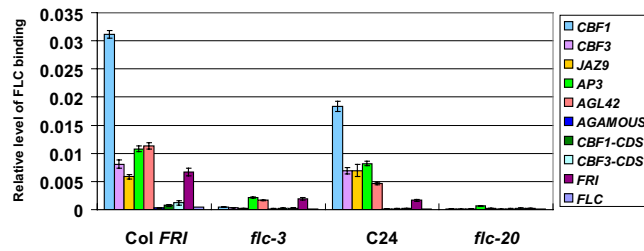

**Fig. S3.** ChIP-PCR validation for selected FLC target genes. ChIP was done with an FLC antibody in Col *FRI* and *C24* and compared with the corresponding *flc* mutant: *flc-3* and *flc-20*. Input DNA was used as the reference in the PCR. *AGAMOUS*, *CBF1-CDS*, *CBF3-CDS*, and *FLC* were used as the negative controls with no FLC binding sites. Error bars represent SEs.

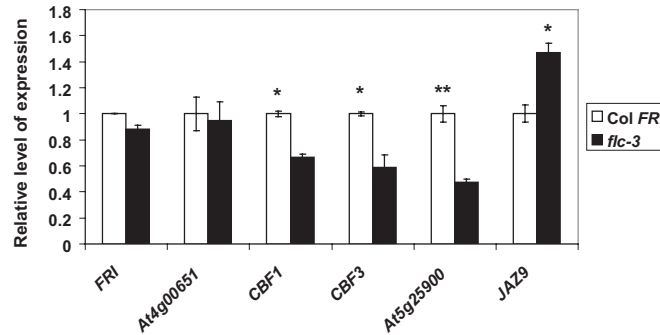

**Fig. S4.** Expression levels of candidate FLC target genes were determined in Col *FRI* and *flc-3* by using quantitative RT-PCR. *Actin* was used as the internal reference. The expression level of each gene in *flc-3* was normalized to the level in Col *FRI*. Error bars represent SEs. Asterisks indicate a significant change (\* $P < 0.05$ ; \*\* $P < 0.01$ ; Student's *t* test).

**Table S1. QuEST parameters for the determination of FLC binding sites**

| Peak category    | Parameter                     | <i>n</i> |
|------------------|-------------------------------|----------|
| Stringent peak   | ChIP enrichment               | 50       |
|                  | ChIP to background enrichment | 3        |
|                  | ChIP extension enrichment     | 3        |
| Recommended peak | ChIP enrichment               | 30       |
|                  | ChIP to background enrichment | 3        |
|                  | ChIP extension enrichment     | 3        |
| Relaxed peak     | ChIP enrichment               | 10       |
|                  | ChIP to background enrichment | 3        |
|                  | ChIP extension enrichment     | 3        |

**Table S2. Motif analysis with the fuzznuc program**

| Peaks/ motifs  | Sequence category |             |          |          |                 |                |
|----------------|-------------------|-------------|----------|----------|-----------------|----------------|
|                | Stringent         | Recommended | Relaxed1 | Relaxed2 | Promoter-random | Genomic-random |
| CCWWWWWWWRG    |                   |             |          |          |                 |                |
| Total peaks    | 41                | 52          | 200      | 205      | 800             | 800            |
| Motif present  | 38                | 45          | 168      | 124      | 477             | 374            |
| Percentage, %  | 92.68             | 86.54       | 84.00    | 60.49    | 59.63           | 46.75          |
| CCWWWWWWWRGWAA |                   |             |          |          |                 |                |
| Total peaks    | 41                | 52          | 200      | 205      | 800             | 800            |
| Motif present  | 20                | 31          | 93       | 68       | 125             | 71             |
| Percentage, %  | 48.78             | 59.62       | 46.50    | 33.17    | 15.63           | 8.88           |

**Table S3. Transcription factor families enriched in the FLC target genes**

| Transcription factor family | No. in FLC targets | Total FLC targets | No. in genome | Total annotated genomic genes | Fisher <i>P</i> value |
|-----------------------------|--------------------|-------------------|---------------|-------------------------------|-----------------------|
| MADS box                    | 11                 | 505               | 109           | 27,416                        | <0.001                |
| AP2-EREBP                   | 10                 | 505               | 138           | 27,416                        | <0.01                 |
| NAC                         | 7                  | 505               | 96            | 27,416                        | <0.05                 |

**Table S4. Primers used in this study**

| Name              | Sequence (5' to 3')        |
|-------------------|----------------------------|
| ChIP primers      |                            |
| SEP3 ChIP For     | AGATGAGAATCGGACGGCT        |
| SEP3 ChIP Rev     | TCTATTTGGGTAACGAGGTCC      |
| SPL15 ChIP For    | GGCCTGACCCGAACACATT        |
| SPL15 ChIP Rev    | CCTCTATTCTCCTCCGTCCTTA     |
| SPL3 ChIP For     | ACTGTTCACTCTTGCTTTTCCA     |
| SPL3 ChIP Rev     | CGGGTTCAAATATGCATGTTGT     |
| JAZ6 ChIP For     | AGGACACGTGAAGTATTGTTATGTG  |
| JAZ6 ChIP Rev     | GGCCTATGAAGTATGAACGCTATAA  |
| SVP ChIP For      | CACGATTTACTTTCCATTTTCAGTCG |
| SVP ChIP Rev      | GAGAGTAAAGAGAAGAGATGGAGGA  |
| DIN10 ChIP For    | TGCAACAGGAAAAGTTTTACAAAT   |
| DIN10 ChIP Rev    | GACGACCTTATCACCAACTAAATTTG |
| AGL16 ChIP For    | TGCCATGTGTCAAAAACATAACAAGC |
| AGL16 ChIP Rev    | GAGATGTGGTTTTTGTGATCGAAAG  |
| SOC1 ChIP For     | TGTGTCGCAAATATGATGGAC      |
| SOC1 ChIP Rev     | CCATCCAAGTAGATATTTATGGGAG  |
| FT ChIP For       | GGTGGAGAAGACCTCAGGAA       |
| FT ChIP Rev       | GTGGGGCATTTTTAACCAAG       |
| FD ChIP For       | CAATCCCACCCATCTTGACT       |
| FD ChIP Rev       | TCGGTGGACAAGTGATTTGA       |
| CBF1 ChIP For     | AGAGTGGAAGGTGAAGAAAACAAC   |
| CBF1 ChIP Rev     | AATCCTCTAAACCCGTGGTTC      |
| CBF3 ChIP For     | AGAGTGAAGTGACGCGACACG      |
| CBF3 ChIP Rev     | CACAAGATAACCCAGTGCCA       |
| JAZ9 ChIP For     | TTGTGGCGTTTGGTGTTTGGC      |
| JAZ9 ChIP Rev     | ATGCACCCGAAACGCCTTAGC      |
| AP3 ChIP For      | TTGTAGGCAGAGGCTAGGTGAG     |
| AP3 ChIP Rev      | CGCGAACGAGTTTGAAGTG        |
| AGL42 ChIP For    | AATATTGCTCAAAGCCTCAAAGTCCG |
| AGL42 ChIP Rev    | CCCTATTTTGGCAAACCTTAACG    |
| AGAMOUS ChIP For  | CCCAAAGATTTTGTGCTCA        |
| AGAMOUS ChIP Rev  | GGTTCAAGTTGGGCAATCAC       |
| CBF1-CDS ChIP For | CCTTATCCAGTTTCTGAAACAGAG   |
| CBF1-CDS ChIP Rev | GCGAAGTTGAGACATGCTGA       |
| CBF3-CDS ChIP For | CCTTATCCAGTTTCTGAAACAGAG   |
| CBF3-CDS ChIP Rev | GGTTTGAATGTTCCGAGCC        |
| FRI ChIP For      | AGAGAGAGATTTTTTGGAGGGGAG   |
| FRI ChIP Rev      | CGATGTGCTTTCAAATCTTTCC     |
| FLC ChIP For      | CCCAGTAAGGAAAAGGCG         |
| FLC ChIP Rev      | TCTCTGTGACGCATCCGTCG       |
| RT-PCR primers    |                            |
| SEP3 RT-PCR For   | CAAGAGAGGCCTTAGCAGAACTTA   |
| SEP3 RT-PCR Rev   | TTTGTCTCAGTCAGCATGCG       |
| SPL15 RT-PCR For  | CGCTCCATCTCTTACGGAAC       |
| SPL15 RT-PCR Rev  | GGCTGAGCCATTGTAACCTT       |
| SPL3 RT-PCR For   | CAACAATGCAGCAGGTTTCA       |
| SPL3 RT-PCR Rev   | AAACAGACAGAGACACAGAGGATT   |
| JAZ6 RT-PCR For   | AAAATTTCGATCTCAAAGGACAAC   |
| JAZ6 RT-PCR Rev   | GCTTTTGTCAAGATTCATGTGACTC  |
| SVP RT-PCR For    | GAGTTCTGTAGCTCCAGCATGA     |
| SVP RT-PCR Rev    | CCGCTTGTCTCATCCATC         |
| DIN10 RT-PCR For  | CTTCTCGCTTTCTGGCATTG       |
| DIN10 RT-PCR Rev  | CGAACCGCCGGTTAATCGT        |
| AGL16 RT-PCR For  | GATTTCTCCAGCTCCAGCATGA     |
| AGL16 RT-PCR Rev  | GGTGAACGAGATTCCTCTC        |
| TEM1 RT-PCR For   | GGCGGAAGCAGCGTCGTTTT       |
| TEM1 RT-PCR Rev   | TCTGCTCAAACCTCATCGGCG      |
| TOE3 RT-PCR For   | GGGAGTCACATATTTGGGACTG     |
| TOE3 RT-PCR Rev   | AAACCCAGTGCTTTGCCTT        |
| SMZ RT-PCR For    | GGGAATCTCATATTTGGGATTG     |
| SMZ RT-PCR Rev    | TGAGTTTTGAATTGGGTGCA       |
| SOC1 RT-PCR For   | ATTCGCCAGCTCCAATATGC       |

**Table S4. Cont.**

| Name                 | Sequence (5' to 3')               |
|----------------------|-----------------------------------|
| SOC1 RT-PCR Rev      | TGAGCTGCTCAATTTGTTCC              |
| FT RT-PCR For        | ACTATATAGGCATCATCACCGTTTCGTTACTCG |
| FT RT-PCR Rev        | ACAACTGGAACAACCTTTGGCAATG         |
| FRI RT-PCR For       | CACCGCTGGCATTAAAGAA               |
| FRI RT-PCR Rev       | AGGAAAGCTTCTATCACGGTAGA           |
| At4g00651 RT-PCR For | CAGTTTAAAGCCTGCAACTCA             |
| At4g00651 RT-PCR Rev | AAATAGACCTCTGGCTCTTGGT            |
| CBF1 RT-PCR For      | CCTTATCCAGTTTCTTGAAACAGAG         |
| CBF1 RT-PCR Rev      | GCGAAGTTGAGACATGCTGA              |
| CBF3 RT-PCR For      | CCTTATCCAGTTTCTTGAAACAGAG         |
| CBF3 RT-PCR Rev      | GGTTTGAAATGTTCCGAGCC              |
| At5g25900 RT-PCR For | GGTGCTAATGCACAGAAACG              |
| At5g25900 RT-PCR Rev | CAACATCAATTGCACCTTCC              |
| JAZ9 RT-PCR For      | CTGTCCAAGAACGAGGGTTAA             |
| JAZ9 RT-PCR Rev      | GGGAGATATGTCATTAAGACGCT           |

For, forward; Rev, reverse.

## Other Supporting Information Files

**Dataset S1.** List of FLC binding sites and the associated target genes

[Dataset S1 \(XLS\)](#)
